# Supplementary material
Source: PubMed Central journal article supplement (PMC5666133)
Supplement: AEM.01369-17_zam999118150s1.pdf [file AEM.01369-17_zam999118150s1.pdf]

# 1 Supplemental Material

**Supplemental Table 1: Distribution of *spa*-types among MRSA isolates**

| <i>spa</i> type     | Baseline visit |                          |                         | Three-month visit |                          |                       |
|---------------------|----------------|--------------------------|-------------------------|-------------------|--------------------------|-----------------------|
|                     | N              | SENTRY MDR, N(%)<br>n=64 | Not MDR, N(%)<br>n=40   | N                 | SENTRY MDR, N(%)<br>n=31 | Not MDR, N(%)<br>n=25 |
| t002                | 5              | 5 (100.00)               | 0 (0.00)                | 5                 | 5 (100.00)               | 0 (0.00)              |
| t008                | 61             | 37 (60.66) <sup>d</sup>  | 24 (39.34) <sup>c</sup> | 30                | 13 (43.33)               | 17 (56.67)            |
| t024                | 8              | 6 (75.00)                | 2 (25.00)               | 4                 | 2 (50.00)                | 2 (50.00)             |
| t068                | 0              | -                        | -                       | 2                 | 2 (100.00) <sup>b</sup>  | 0 (0.00)              |
| t084                | 1              | 0 (0.00)                 | 1 (100.00)              | 0                 | -                        | -                     |
| t105                | 1              | 1 (100.00)               | 0 (0.00)                | 0                 | -                        | -                     |
| t121                | 3              | 2 (66.67)                | 1 (33.33)               | 2                 | 1 (50.00)                | 1 (50.00)             |
| t127                | 0              | -                        | -                       | 1                 | 0 (0.00)                 | 1 (100.00)            |
| t164                | 1              | 1 (100.00)               | -                       | -                 | -                        | -                     |
| t179                | 0              | -                        | -                       | 1                 | 1 (100.00)               | 0 (0.00)              |
| t211                | 1              | 0 (0.00)                 | 1 (100.00)              | 0                 | -                        | -                     |
| t216                | 3              | 2 (66.67)                | 1 (33.33)               | 2                 | 0 (0.00)                 | 2 (100.00)            |
| t304                | 1              | 0 (0.00)                 | 1 (100.00)              | 0                 | -                        | -                     |
| t334                | 0              | -                        | -                       | 1                 | 1 (100.00) <sup>b</sup>  | 0 (0.00)              |
| t359                | 1              | 0 (0.00)                 | 1 (100.00)              | 0                 | -                        | -                     |
| t622                | 2              | 0 (0.00)                 | 2 (100.00)              | 2                 | 1 (50.00) <sup>b</sup>   | 1 (50.00)             |
| t688                | 3              | 3 (100.00) <sup>b</sup>  | 0 (0.00)                | 2                 | 2 (100.00) <sup>b</sup>  | 0 (0.00)              |
| t922                | 0              | -                        | -                       | 1                 | 0 (0.00)                 | 1 (100.00)            |
| t1171               | 4              | 2 (50.00) <sup>b</sup>   | 2 (50.00)               | 1                 | 1 (100.00)               | 0 (0.00)              |
| t6774               | 1              | 1 (100.00)               | 0 (0.00)                | 0                 | -                        | -                     |
| t9963               | 1              | 0 (0.00)                 | 1 (100.00)              | 0                 | -                        | -                     |
| t10171              | 2              | 2 (100.00)               | 0 (0.00)                | 0                 | -                        | -                     |
| t12500              | 2              | 0 (0.00)                 | 2 (100.00) <sup>b</sup> | 2                 | 2 (100.00)               | 0 (0.00)              |
| t16872 <sup>a</sup> | 1              | 1 (100.00)               | 0 (0.00)                | 0                 | -                        | -                     |
| t16873 <sup>a</sup> | 2              | 1 (50.00)                | 1 (50.00)               | 0                 | -                        | -                     |

2  
3 <sup>a</sup>New type assigned via the Ridom *spa* server  
4 <sup>b</sup>All isolates mupirocin non-susceptible; <sup>c</sup>Two isolates mupirocin non-susceptible; <sup>d</sup>One isolate mupirocin  
5 non-susceptible  
6  
7

Supplemental Table 2: Antimicrobial drug use among rural homes

|                       | Baseline visit |                     |                            |                   | Three-month visit |                       |                            |                   |
|-----------------------|----------------|---------------------|----------------------------|-------------------|-------------------|-----------------------|----------------------------|-------------------|
|                       | N              | Rural, N(%)<br>n=14 | Not Rural,<br>N(%)<br>n=90 | Chi-sq<br>p-value | N                 | Rural,<br>N(%)<br>n=8 | Not Rural,<br>N(%)<br>n=48 | Chi-sq<br>p-value |
| <b>Any HH Abx Use</b> |                |                     |                            |                   |                   |                       |                            |                   |
| Hum or Pet use        | 96             | 14 (14.58)          | 82 (85.42)                 | 0.25              | 17                | 4 (23.53)             | 13 (76.47)                 | 0.19              |
| No Use                | 8              | 0 (0.00)            | 8 (100.0)                  |                   | 39                | 4 (10.26)             | 35 (89.74)                 |                   |
| <b>Individual Abx</b> |                |                     |                            |                   |                   |                       |                            |                   |
| <b>Clinda Use</b>     |                |                     |                            |                   |                   |                       |                            |                   |
| Yes                   | 41             | 1 (2.44)            | 40 (97.56)                 | <b>0.01</b>       | 22                | 1 (4.55)              | 21 (95.45)                 | 0.09              |
| No                    | 63             | 13 (20.63)          | 50 (79.37)                 |                   | 34                | 7 (20.59)             | 27 (79.41)                 |                   |
| <b>Sulfa Use</b>      |                |                     |                            |                   |                   |                       |                            |                   |
| Yes                   | 52             | 11 (21.15)          | 41 (78.85)                 | <b>0.02</b>       | 33                | 7 (21.21)             | 26 (78.79)                 | 0.08              |
| No                    | 52             | 3 (5.77)            | 49 (94.23)                 |                   | 23                | 1 (4.35)              | 22 (95.65)                 |                   |
| <b>Mup Use</b>        |                |                     |                            |                   |                   |                       |                            |                   |
| Yes                   | 12             | 0 (0.00)            | 12 (100.00)                | 0.15              | 5                 | 0 (0.00)              | 11 (100.00)                | 0.13              |
| No                    | 92             | 14 (15.22)          | 78 (84.78)                 |                   | 51                | 8 (17.78)             | 37 (82.22)                 |                   |

9

10 *P-Values were obtained using chi-squared analysis.*11 *Significance is as follows; \* ≤0.05, \*\*≤0.01, \*\*\*≤0.001*
